# Supplementary material
Source: HighWire-hosted journal article supplement (https://www.cmaj.ca/highwire/filestream/58186/field_highwire_adjunct_files/1/guide-burns-appendix_2.pdf)
Supplement: guide-burns-appendix_2.pdf [file guide-burns-appendix_2.pdf]

**Appendix 2: Meta-analysis by Nakash and colleagues<sup>1</sup> of methods of improving response rates to postal questionnaires in health care research**

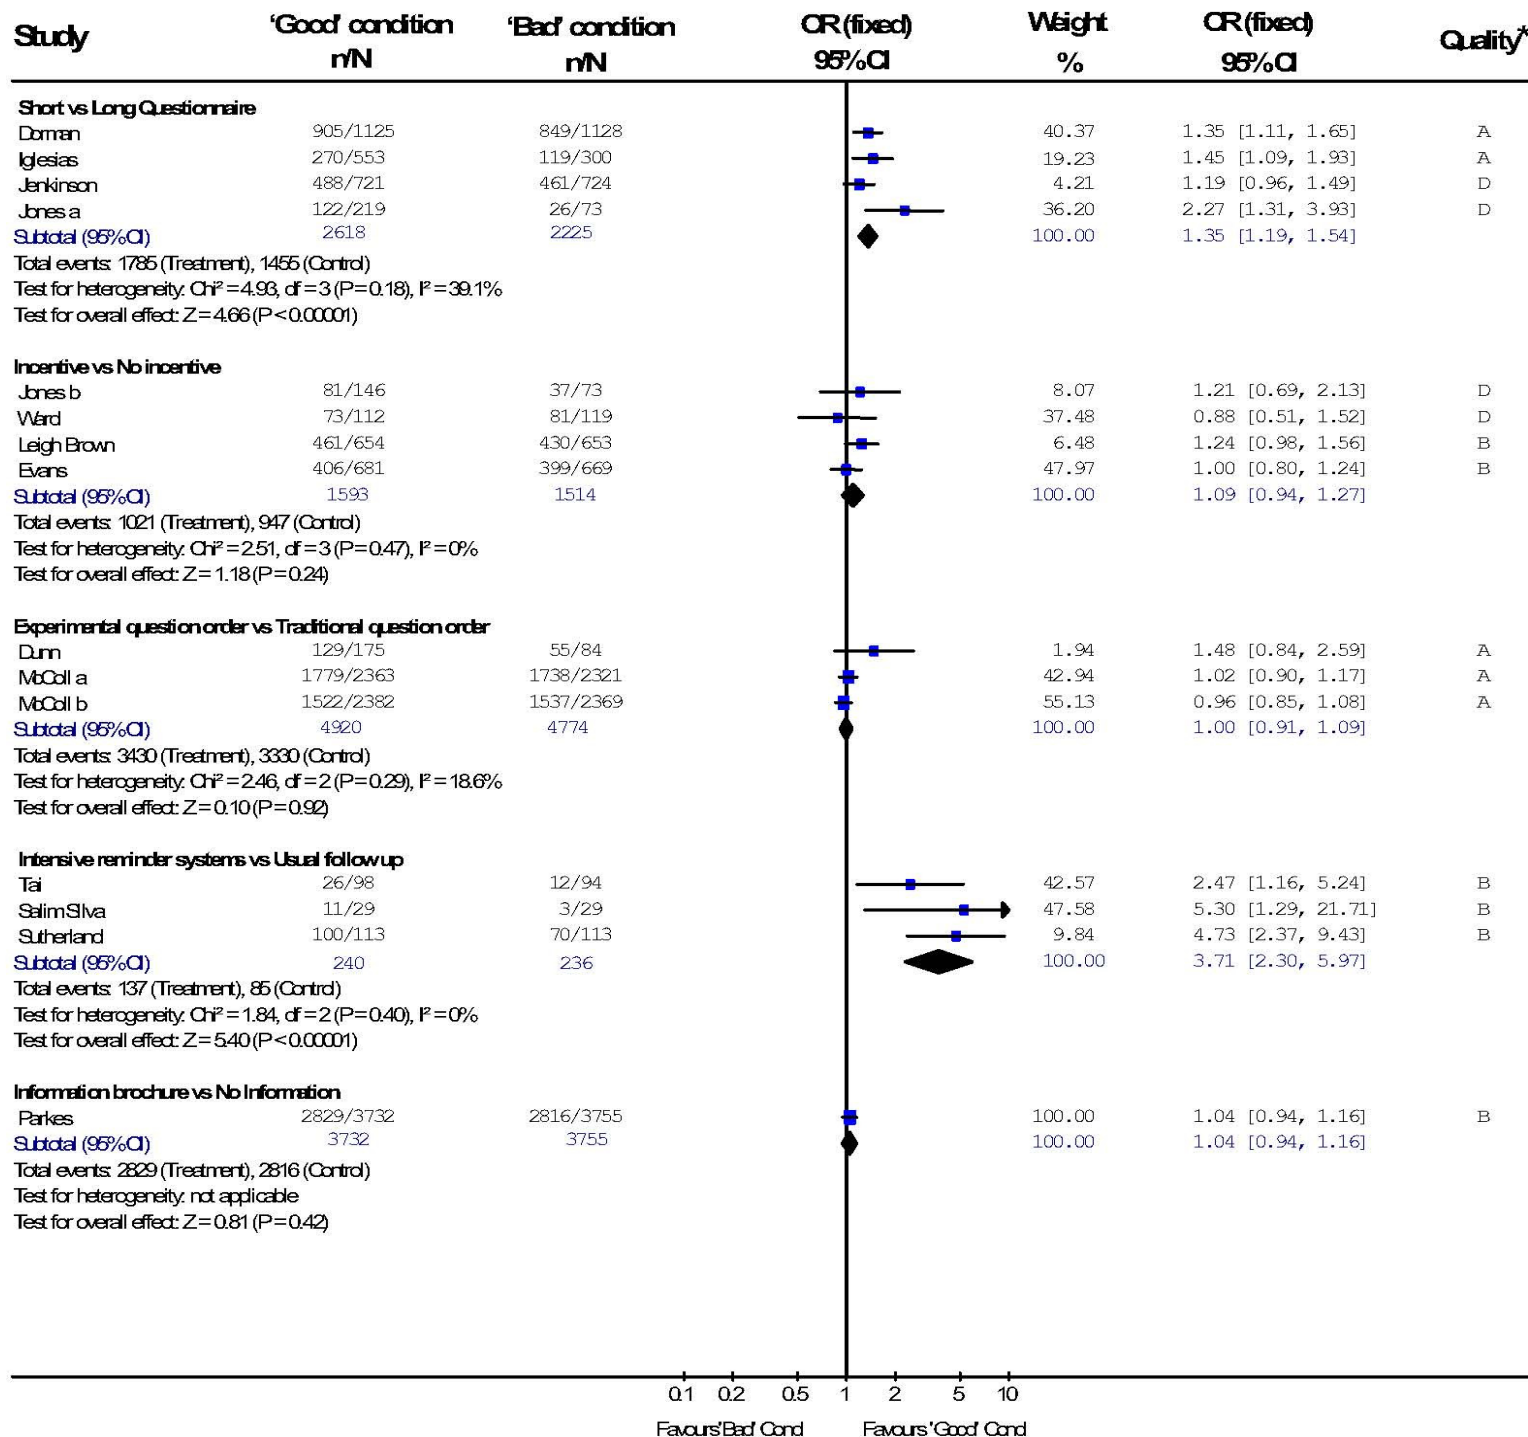

\*Quality: A = good, B = moderate, C = poor, D = unclear from report.

**Reference**

1. Nakash RA, Hutton JL, Jørstad-Stein EC, et al. Maximising response to postal questionnaires: a systematic review of randomised trials in health research. *BMC Medical Research Methodology* 2006;6:5 (available [www.biomedcentral.com/1471-2288/6/5](http://www.biomedcentral.com/1471-2288/6/5)).
